# Supplementary material for: A 20-year satellite-reanalysis-based climatology of extreme precipitation characteristics over the Sinai Peninsula
Source: Copernicus journal article supplement (doi:10.5194/esd-14-931-2023), 2023-09-08
Supplement: Supplementary file 1 [file esd-14-931-2023-supplement.pdf]

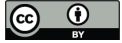

*Supplement of*

## **A 20-year satellite-reanalysis-based climatology of extreme precipitation characteristics over the Sinai Peninsula**

**Mohsen Soltani et al.**

*Correspondence to:* Mohsen Soltani (mohsen.soltani@uwaterloo.ca)

The copyright of individual parts of the supplement might differ from the article licence.

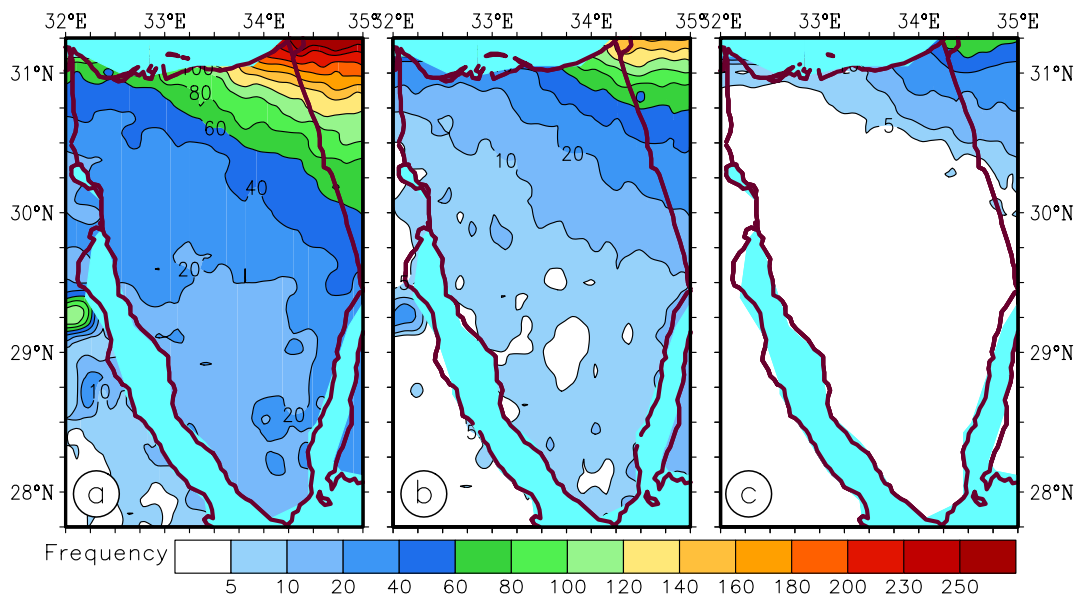

**Figure S1.** Frequency occurrence of the precipitation events with thresholds of a)  $\geq 5$ mm/day, b)  $\geq 10$ mm/day and c)  $\geq 20$ mm/day in the Sinai Peninsula for the period of 2001-2020. Units are in days.

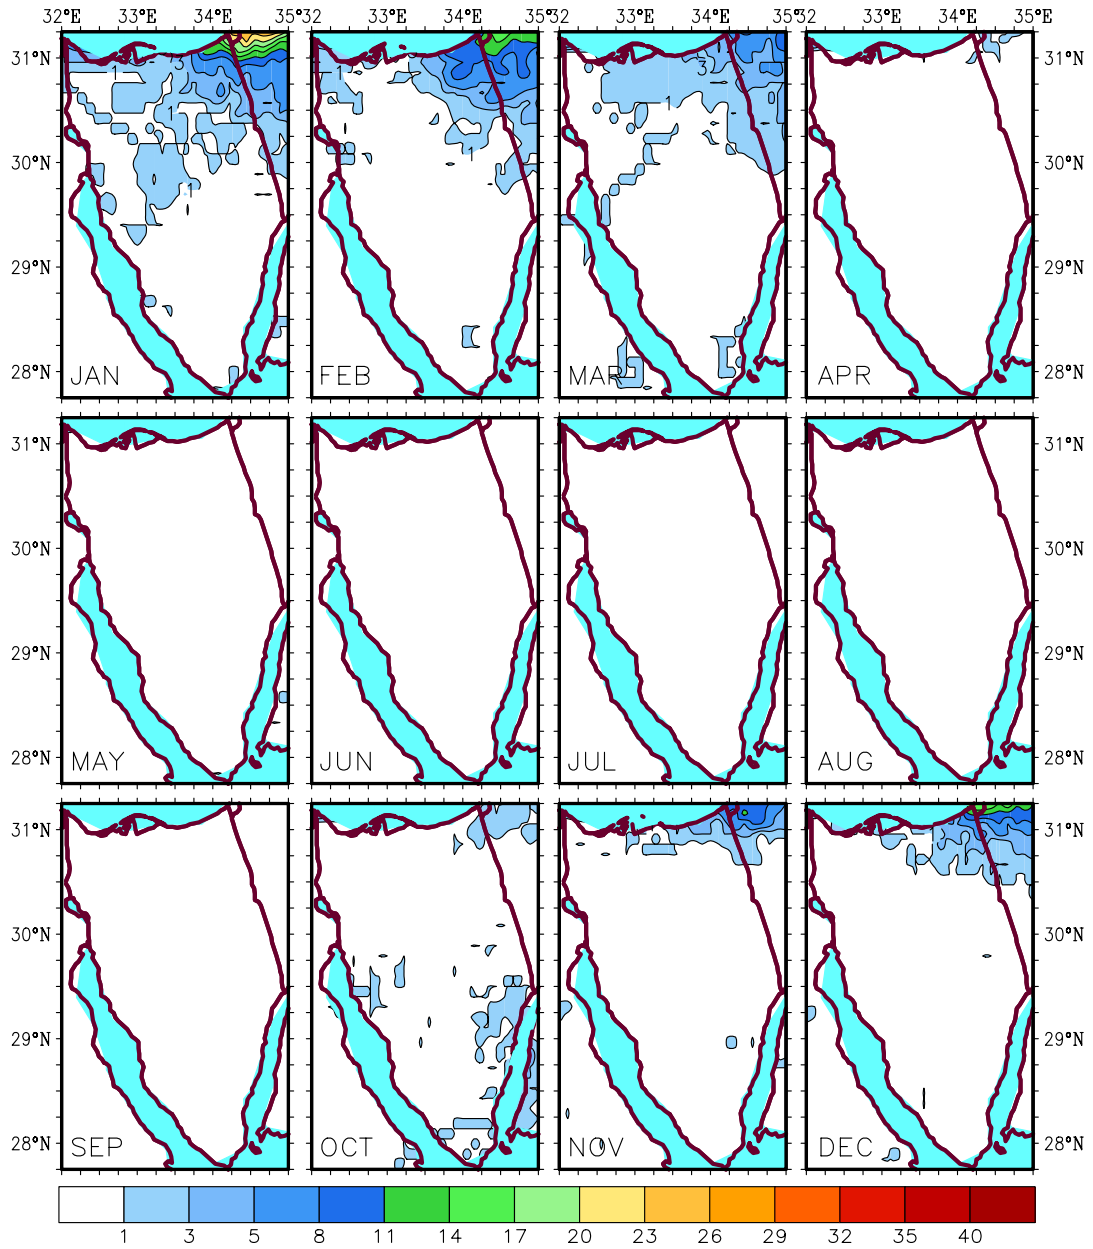

**Figure S2.** Frequency occurrence of the monthly precipitation climatology events with a threshold of  $\geq 20$  mm/day for the period of 2001-2020 (7305 days) over the Sinai Peninsula. Units are frequency in days.

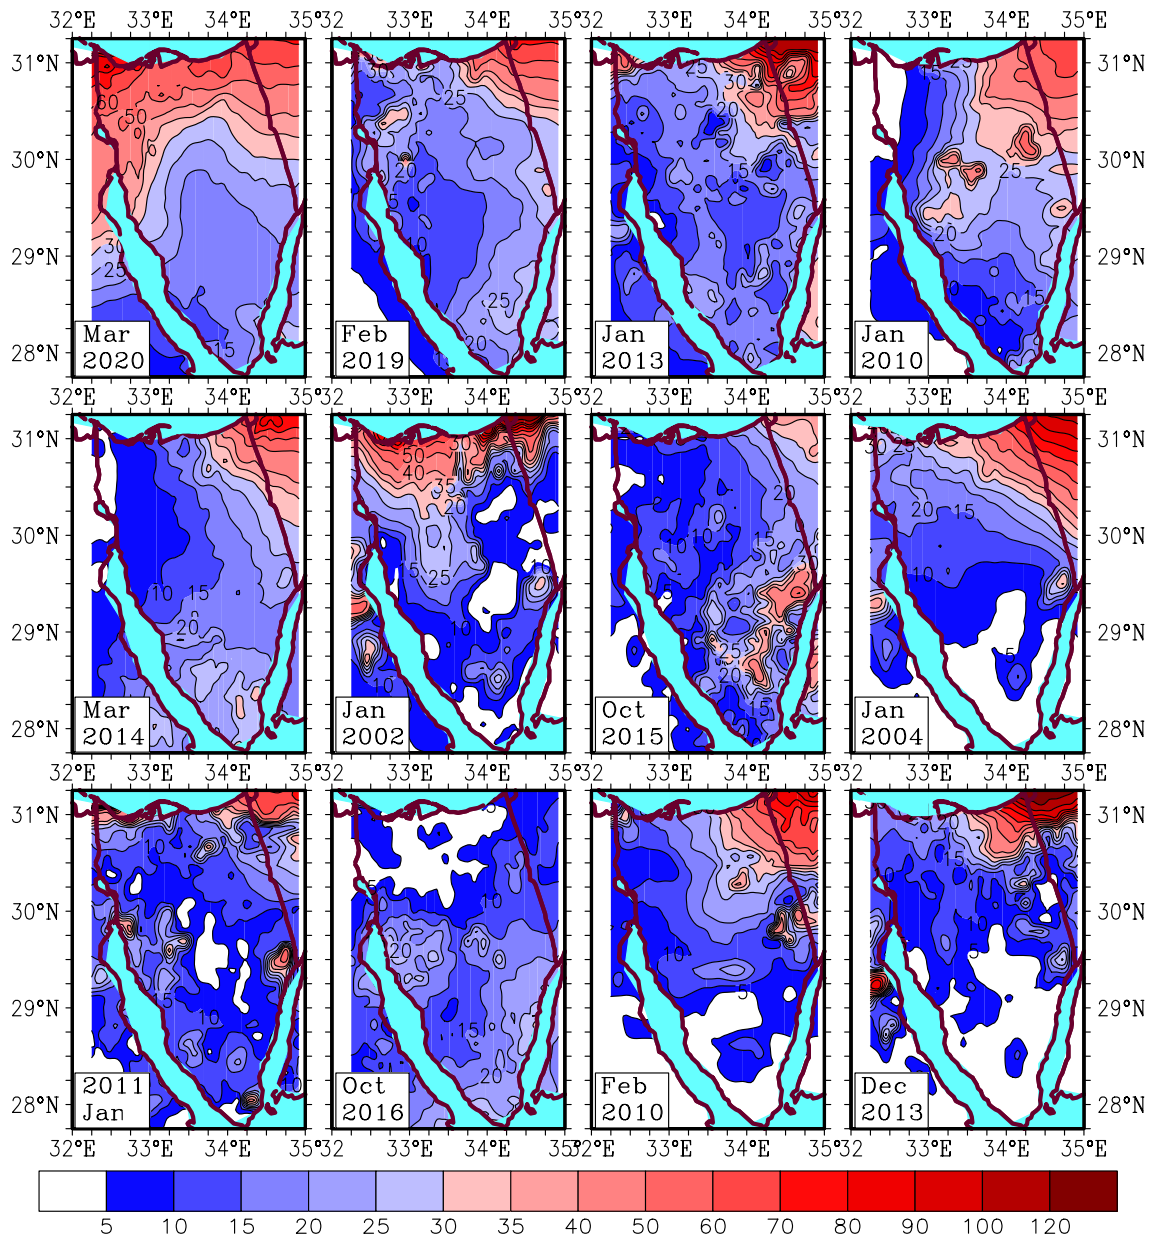

**Figure S3.** The twelve wettest months (out of 240 months) in the Sinai Peninsula for the period of 2001-2020. The panels are ranked in order from top-left to bottom-right. Units are in mm.

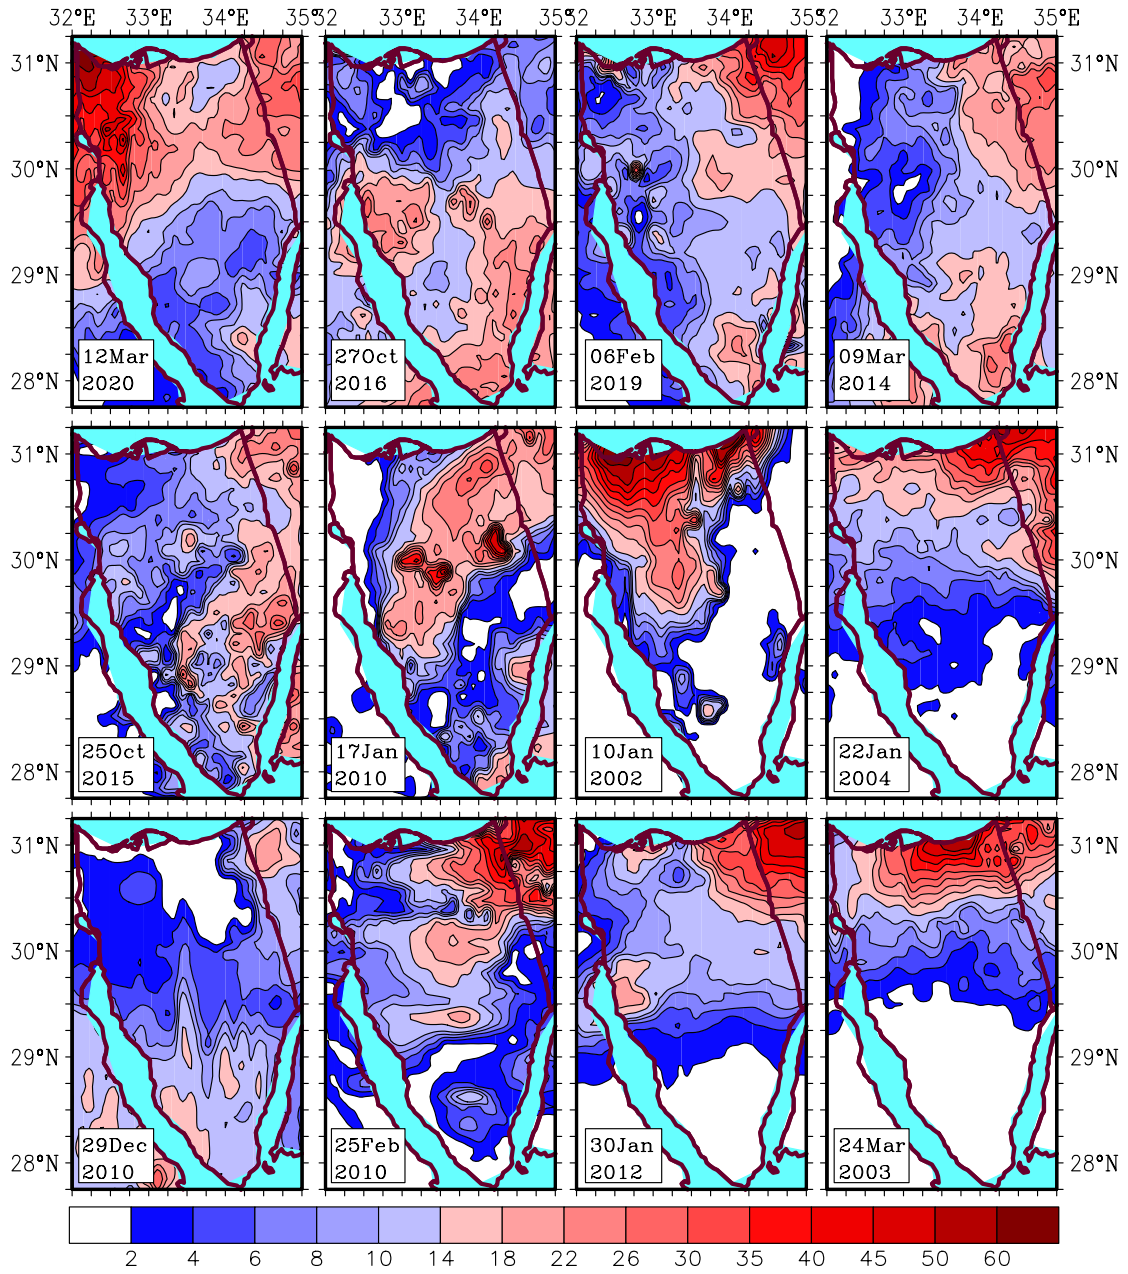

Figure S4. Same as Fig. S3, but for the twelve wettest days (out of 7305 days).

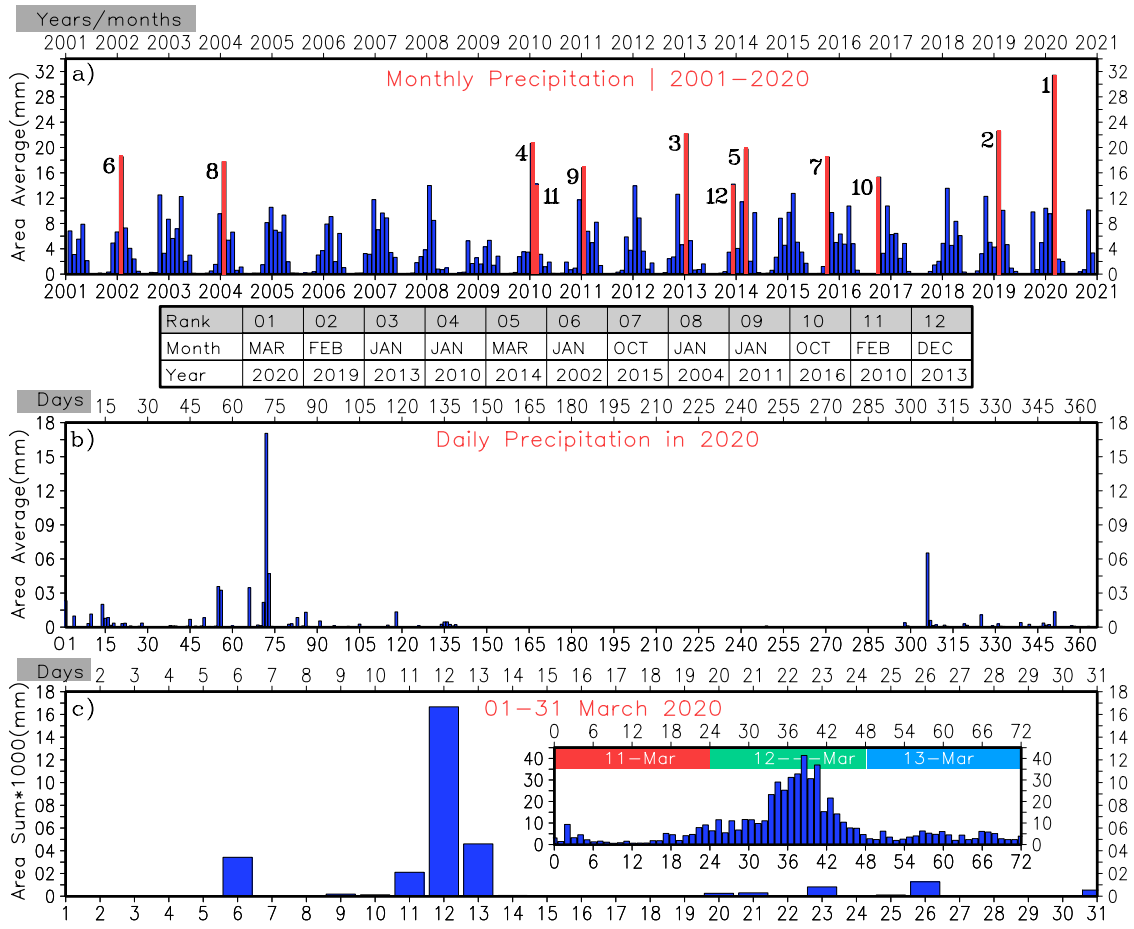

**Figure S5.** The regional averaged precipitation amounts over the of Sinai Peninsula: a) areal averaged monthly precipitation timeseries for the climatology period of 2001-2020 (240 months), and the table ranks 12 months/years with the highest rainfall received over the past two decades; b) daily precipitation timeseries in 2020; c) daily precipitation of the period 1-31 March 2020, and the subplot indicates the rainfall event of 11-13 March in hourly interval.

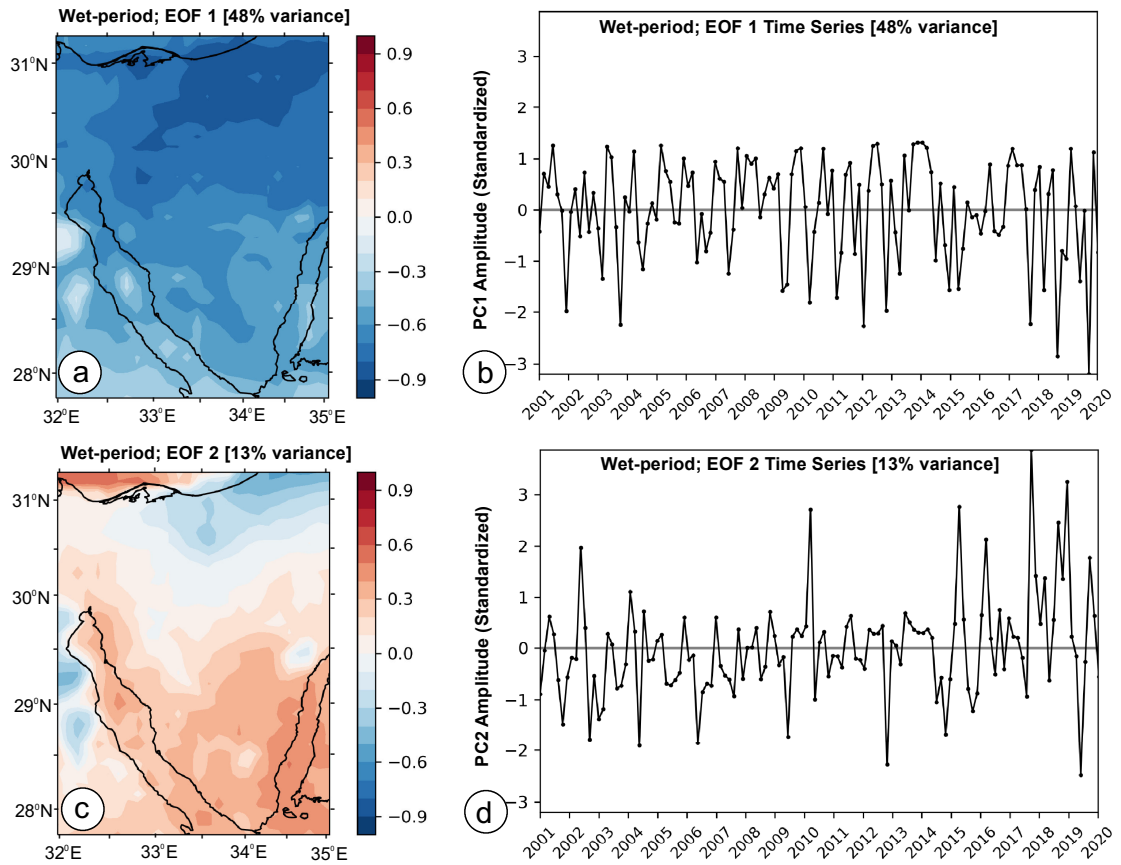

**Figure S6.** The two leading EOF spatial patterns (a and c) and the associated timeseries (b and d) of the monthly mean precipitation dataset (wet-period: October-March, 120 months) for the climatology period of 2001-2020 in the Sinai Peninsula. The values of EOFs (a and c) are expressed as correlation coefficients.

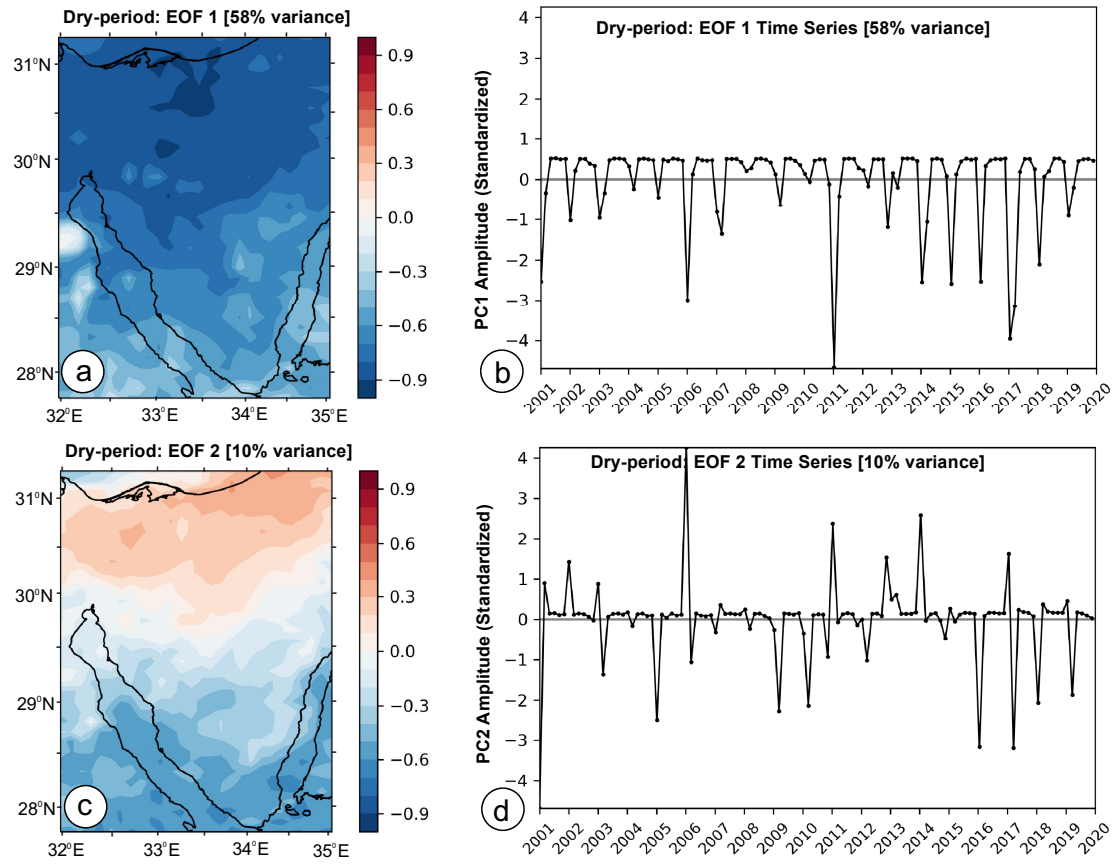

**Figure S7.** Same as Fig. S6, but for the dry-period (April-September).



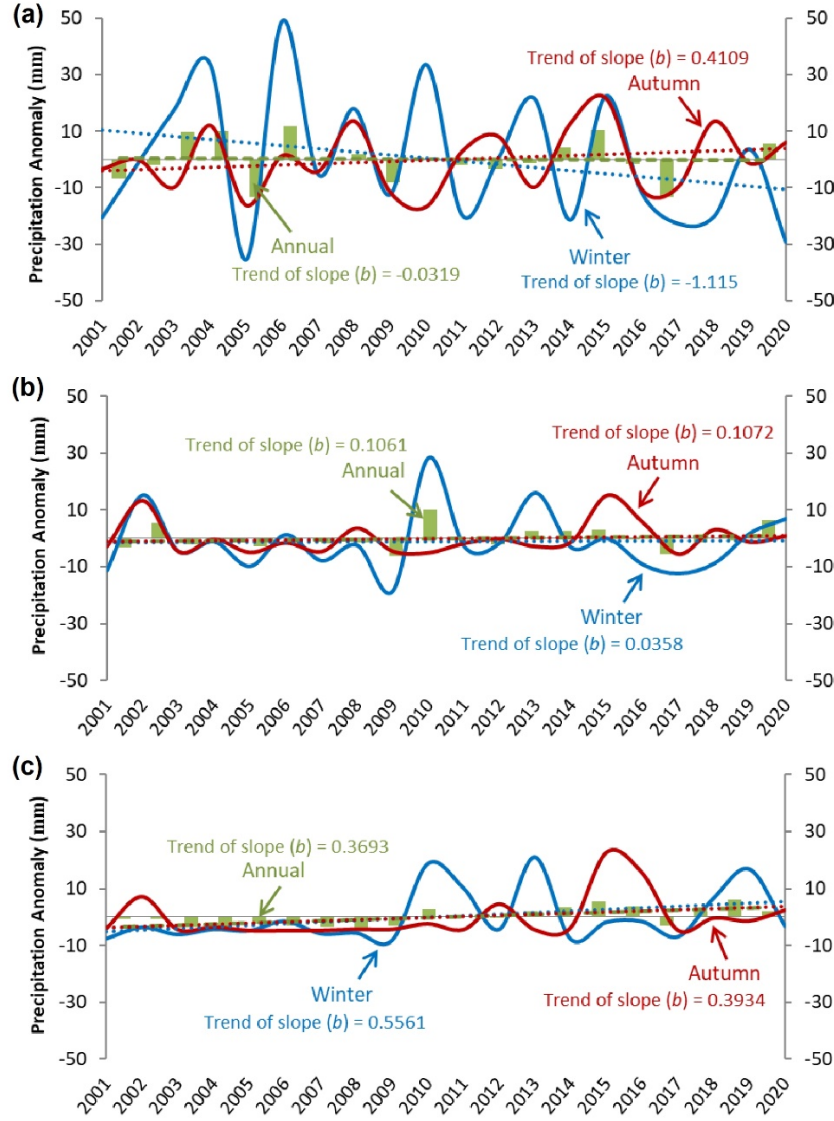

**Figure S8.** Annual and seasonal changes in the total precipitation (mm) for three selected sites in (a) north, (b) middle and (c) south of the Sinai Peninsula during 2001-2020. For the locations of the sites, see Fig. 1 in the manuscript. In the panels, winter (DJF) is given in blue, autumn (SON) is given in red, and annual in green color.

**Table S1.** The 95% and 99% bootstrapped confidence interval (CI) for the Mean and Median values of the original dataset (mean seasonal and annual for 20-years: 2001-2020) for the selected sites across the Sinai (anomaly-based analysis in Fig. S8), see Fig. 1 for the locations. For this analysis, 300 bootstrapped samples were generated each with a sample size of  $n=10$ .

|                                                                        | North-site  |             |             | Middle-site |            |            | South-site |            |            |
|------------------------------------------------------------------------|-------------|-------------|-------------|-------------|------------|------------|------------|------------|------------|
|                                                                        | Winter      | Autumn      | Annual      | Winter      | Autumn     | Annual     | Winter     | Autumn     | Annual     |
| <i>Average precipitation (mm)</i>                                      | <b>68.6</b> | <b>18.5</b> | <b>28.4</b> | <b>22</b>   | <b>6.1</b> | <b>9.3</b> | <b>9.1</b> | <b>4.8</b> | <b>5.1</b> |
| <b>95%</b> bootstrapped CI for <b>Mean</b> value of original dataset   | 79.8        | 24          | 31.9        | 30.8        | 9.1        | 11.2       | 14.3       | 9.4        | 6.9        |
| <b>99%</b> bootstrapped CI for <b>Mean</b> value of original dataset   | 85.5        | 26          | 33.4        | 35.4        | 10.3       | 12         | 16.2       | 10.8       | 7.3        |
| <b>95%</b> bootstrapped CI for <b>Median</b> value of original dataset | 88.3        | 26.1        | 31.4        | 23.9        | 7.5        | 10.5       | 11.7       | 5.3        | 7.5        |
| <b>99%</b> bootstrapped CI for <b>Median</b> value of original dataset | 90.4        | 29.1        | 36.1        | 29.1        | 9.7        | 12         | 17.5       | 8.2        | 8.3        |

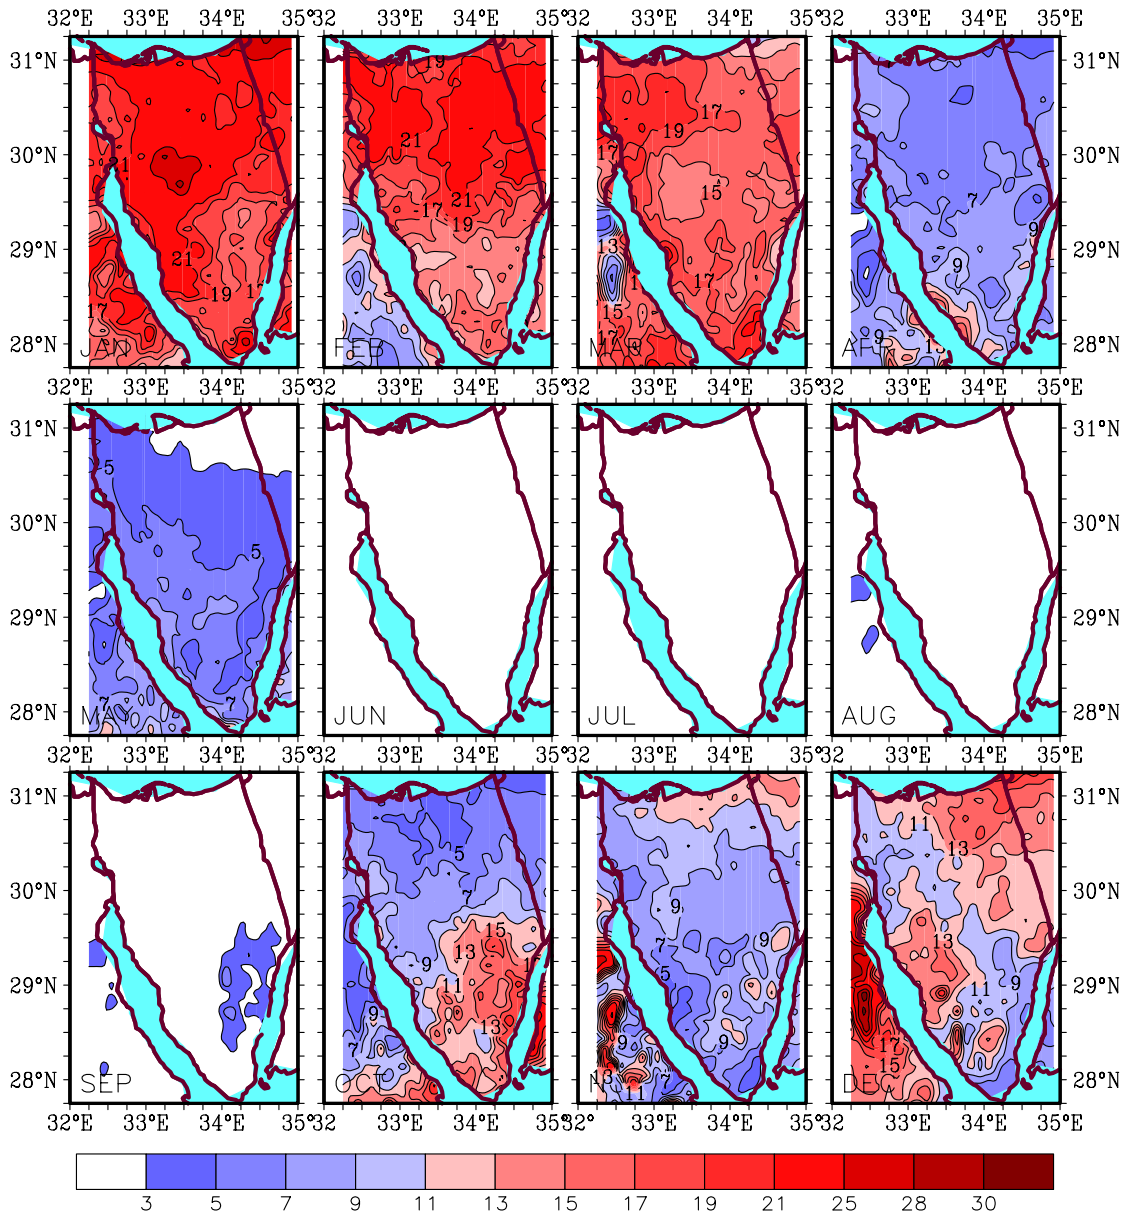

**Figure S9.** Monthly precipitation regime: the ratios of monthly sum precipitation to the annual total precipitation (%) in the Sinai Peninsula for the period of 2001-2020. Units are in percentage.

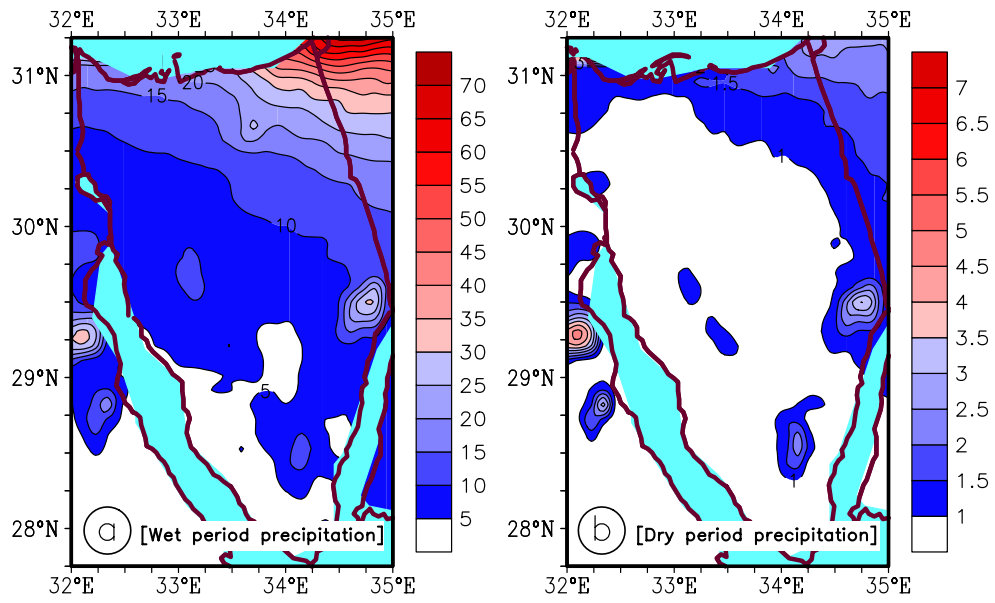

**Figure S10.** Mean monthly precipitation for: (a) wet period from October to March, and (b) dry period from April to September in the Sinai Peninsula for the period of 2001-2020. Units are in mm/month.
